# Supplementary material
Source: PubMed Central journal article supplement (PMC5901959)

**Supplemental Figure 1**

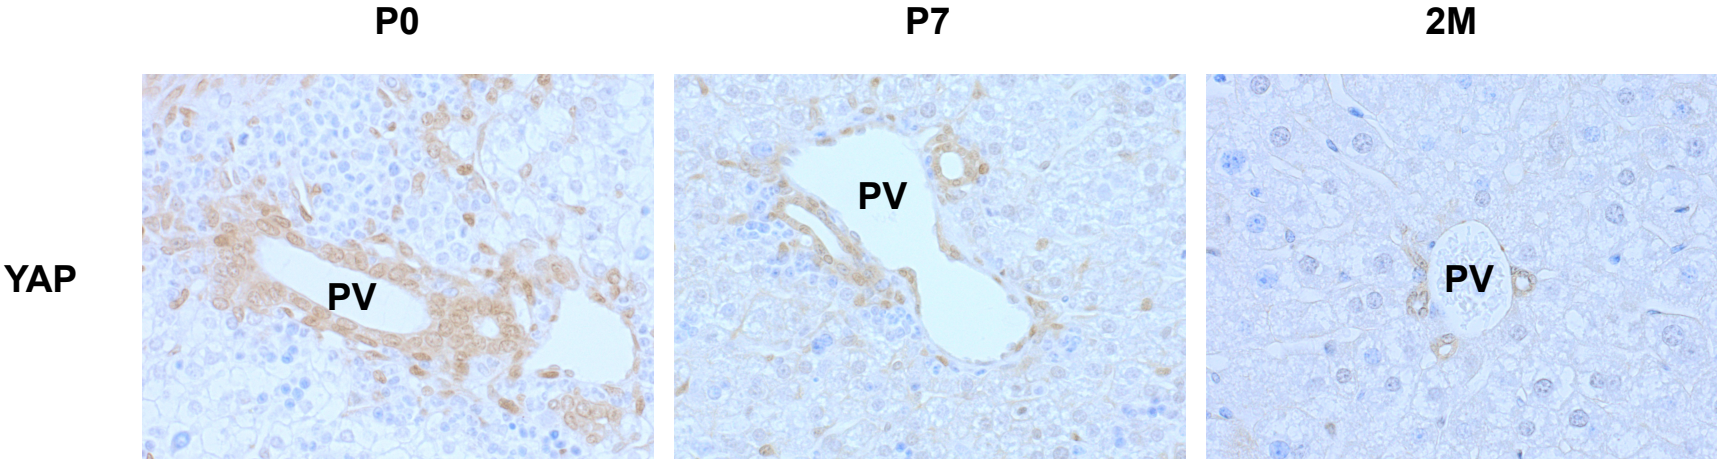

Supplement: NIHMS954151-supplement-Suppl_Fig_1.pdf [file NIHMS954151-supplement-Suppl_Fig_1.pdf]

## Supplemental Figure 2

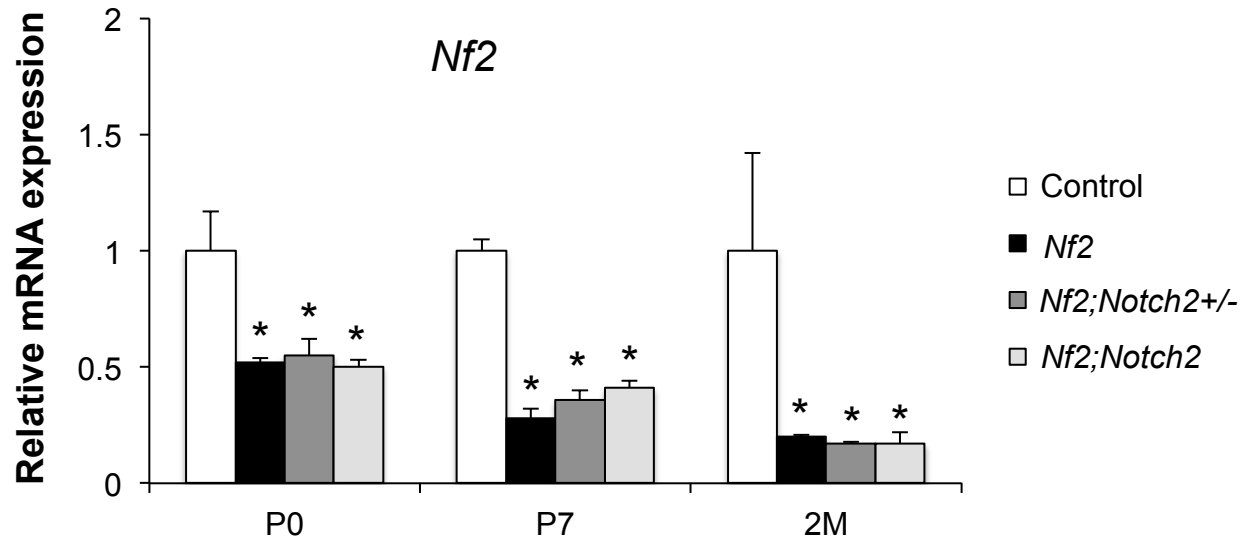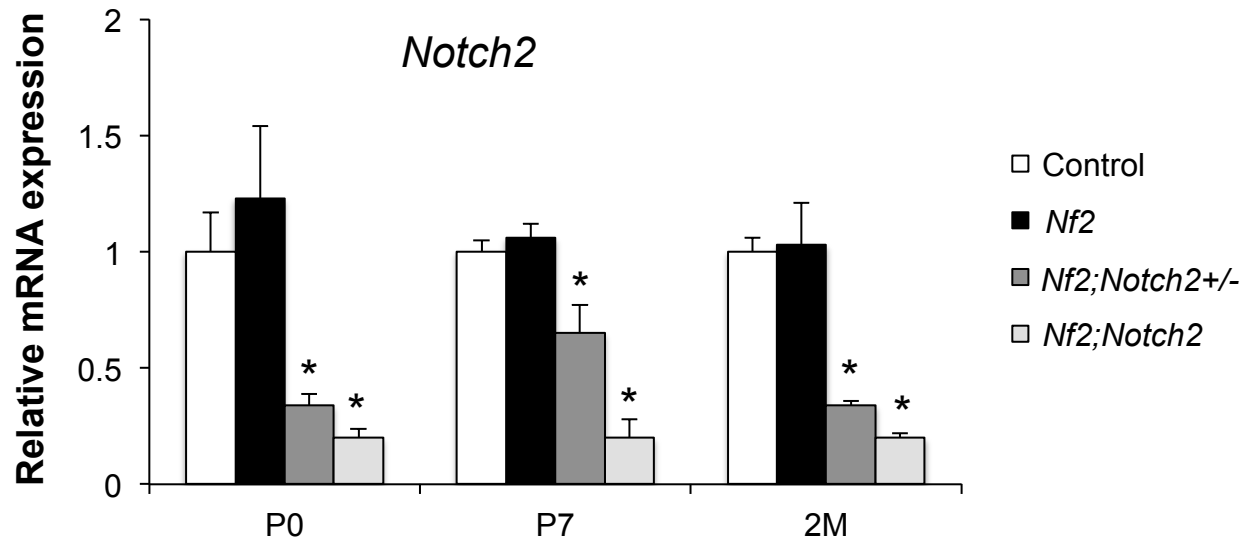

Supplement: NIHMS954151-supplement-Suppl_Fig_2.pdf [file NIHMS954151-supplement-Suppl_Fig_2.pdf]

# Supplemental Figure 3

**A**

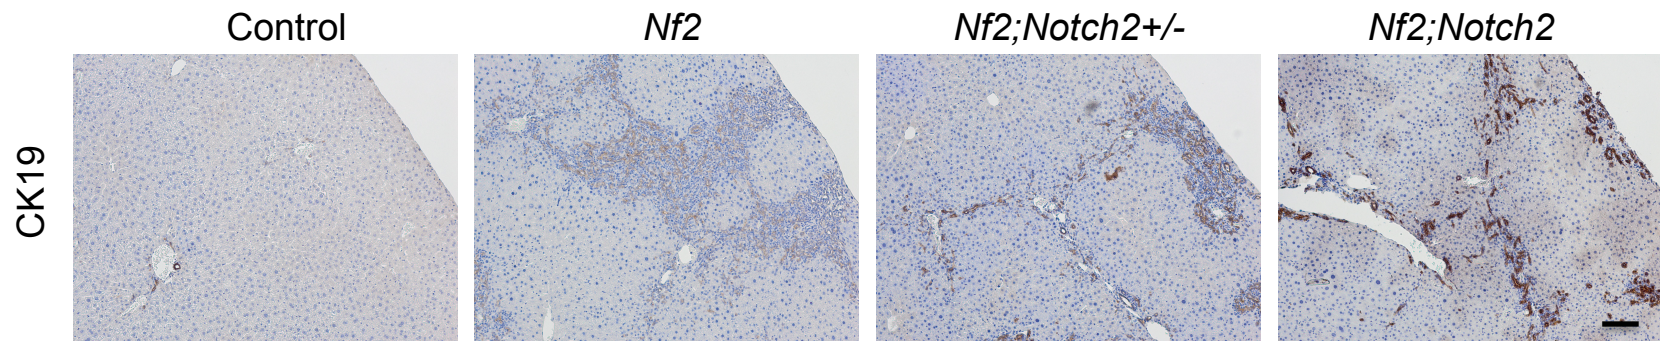

**B**

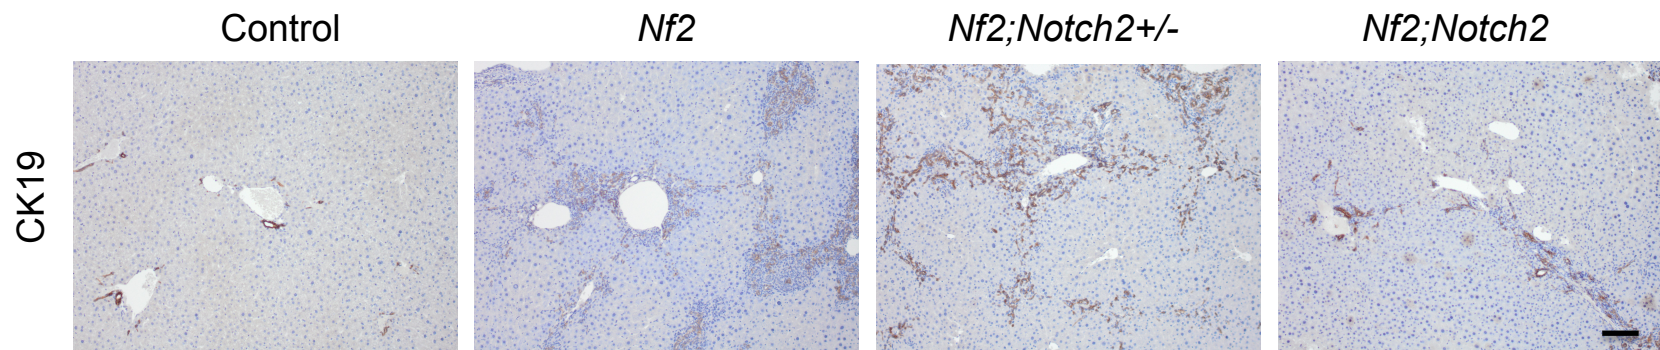

**C**

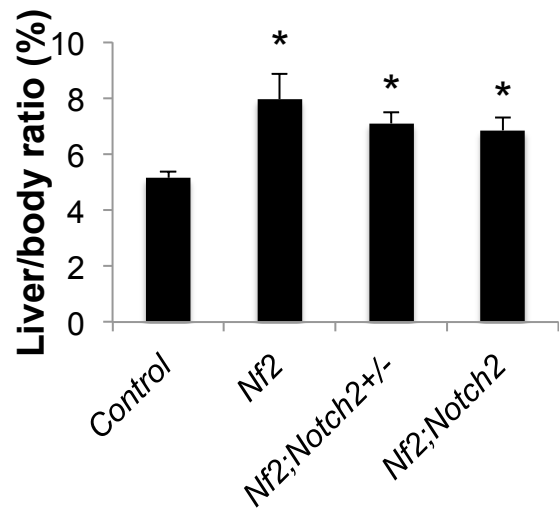

**D**

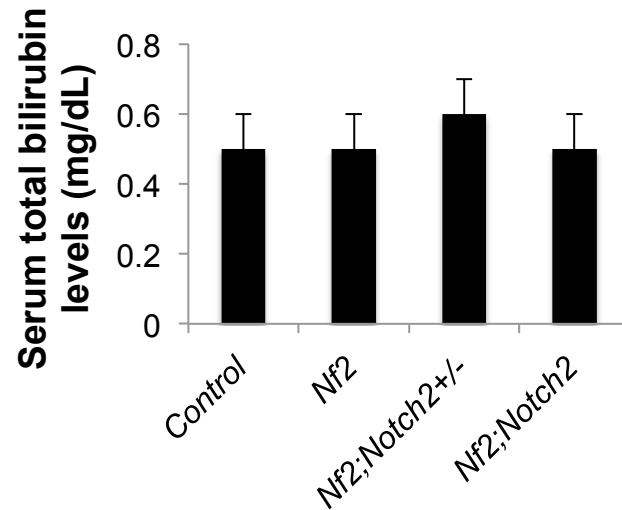

**E**

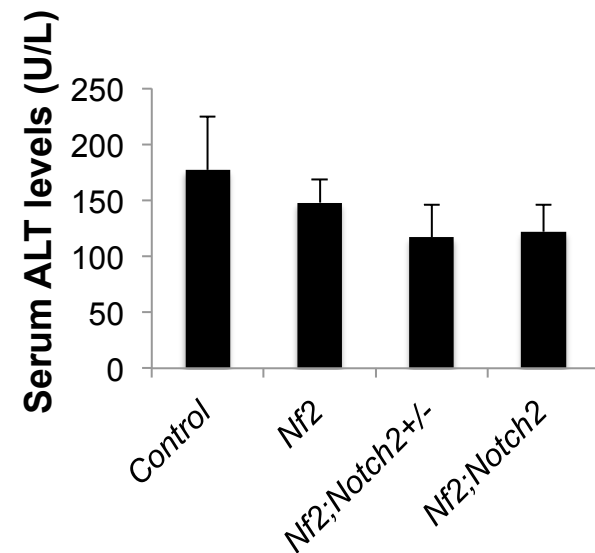

Supplement: NIHMS954151-supplement-Suppl_Figure_3.pdf [file NIHMS954151-supplement-Suppl_Figure_3.pdf]
